# Supplementary material for: A cell-penetrating whole molecule antibody targeting intracellular HBx suppresses hepatitis B virus via TRIM21-dependent pathway
Source: PubMed Central journal article supplement — Theranostics. 2018 Jan 1;8(2):549–62. doi: 10.7150/thno.20047 (PMC5743566; doi:10.7150/thno.20047), 2018-01-01
Supplement: thnov08p0549s1.pdf [file thnov08p0549s1.pdf]

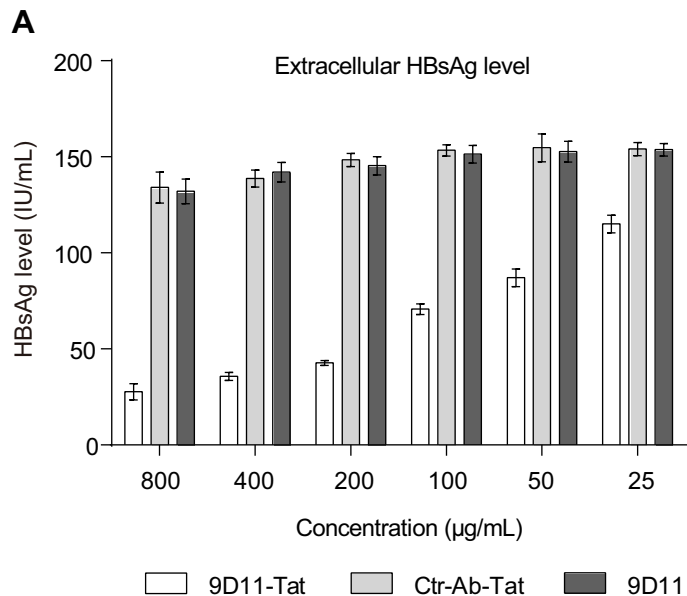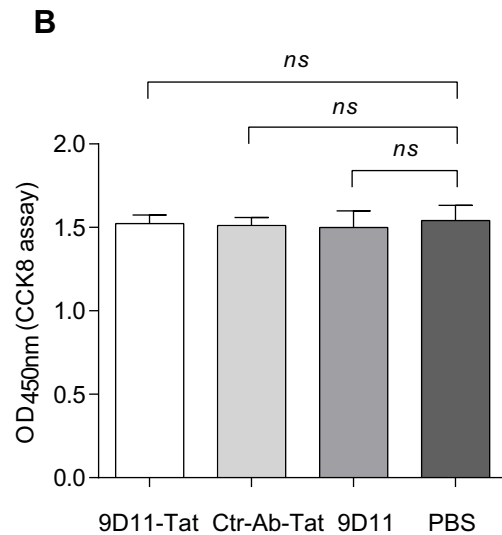

Figure S1. Evaluations of dose-dependent anti-HBV effect (A) and potential cytotoxicity (B) of 9D11-Tat

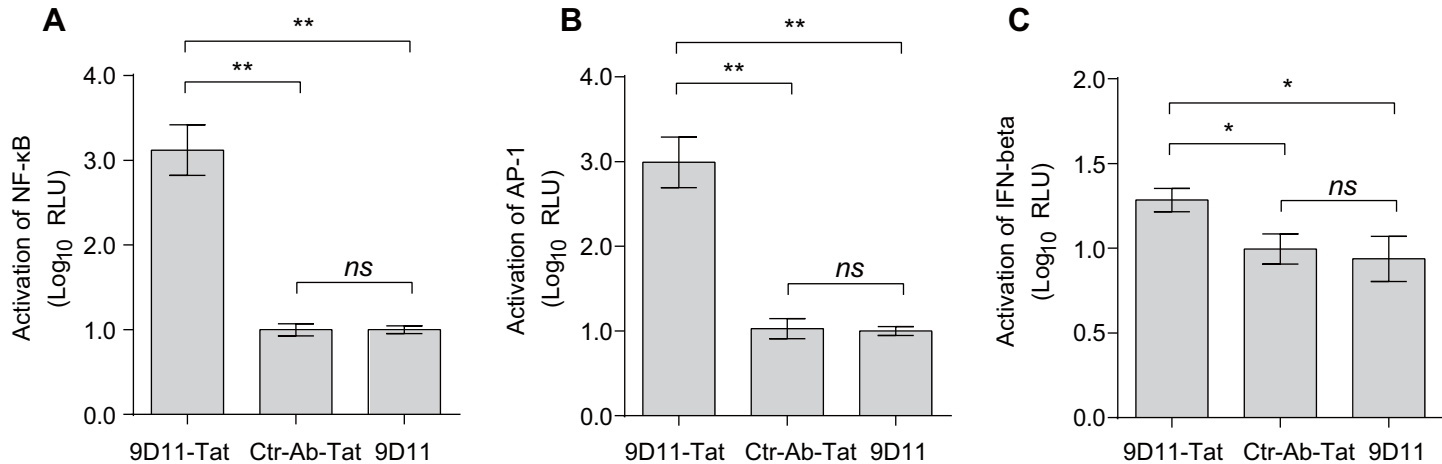

Figure S2. Influence of 9D11-Tat on the promoter activities of NF- $\kappa$ B (A), AP1 (B), and IFN- $\beta$  (C)

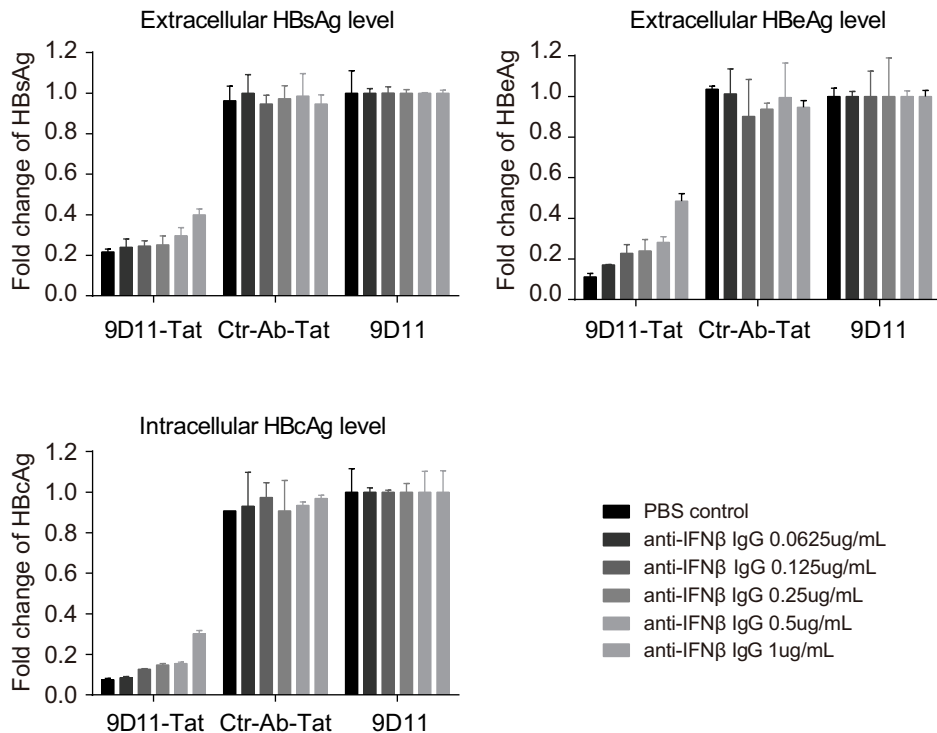

Figure S3. Anti-IFN- $\beta$  neutralizing antibody could partially reverse 9D11-Tat-mediated HBV suppression

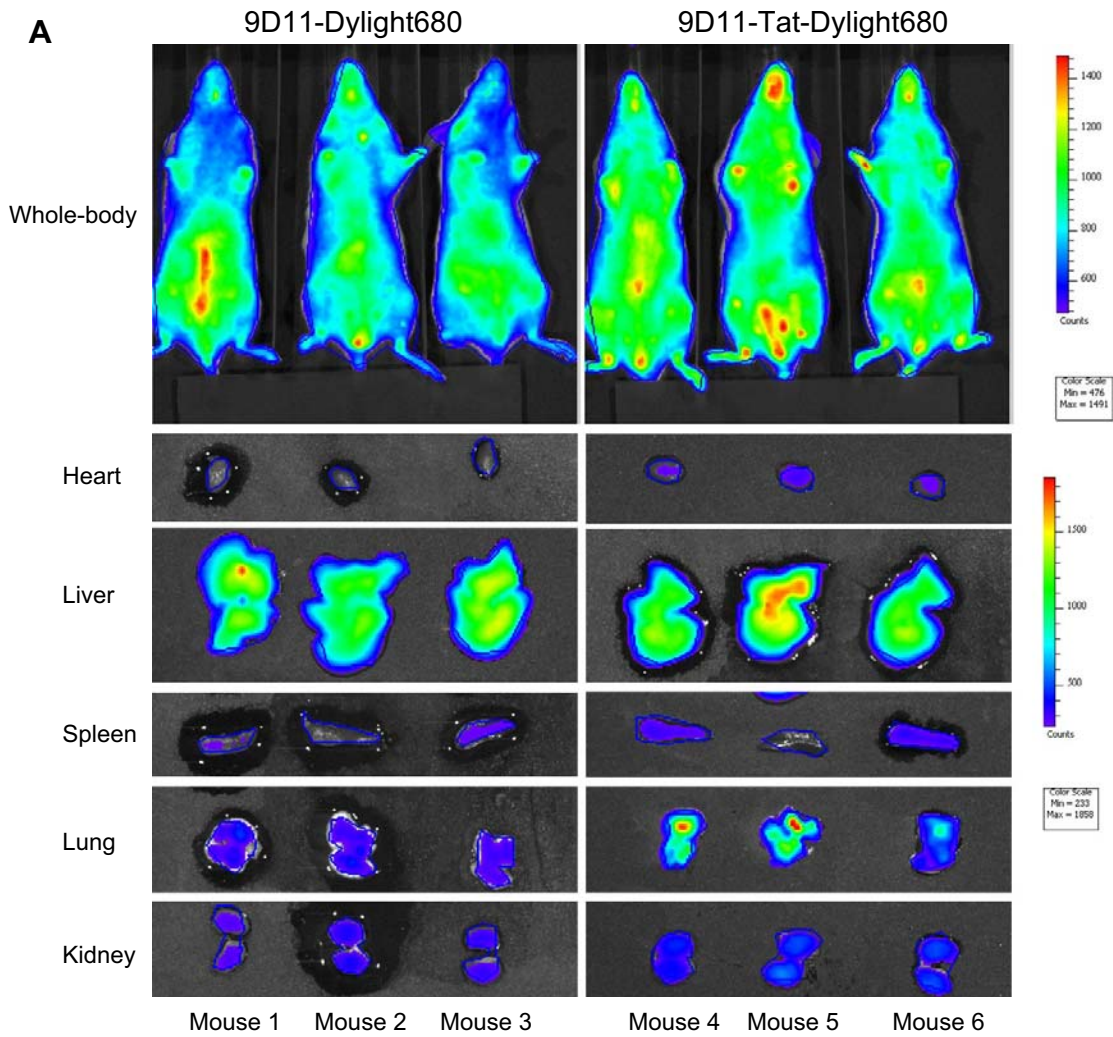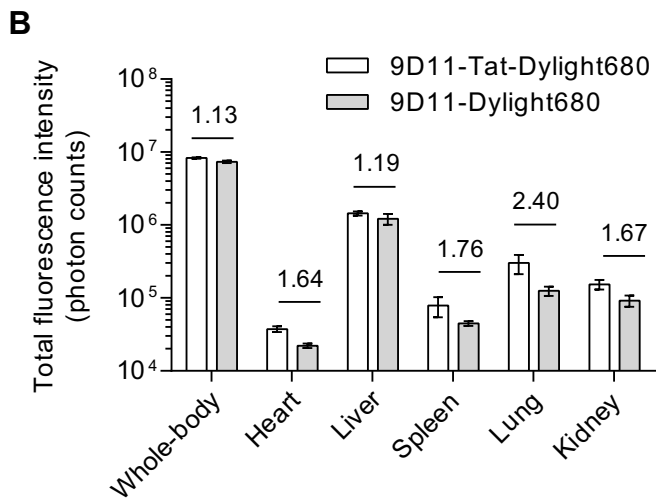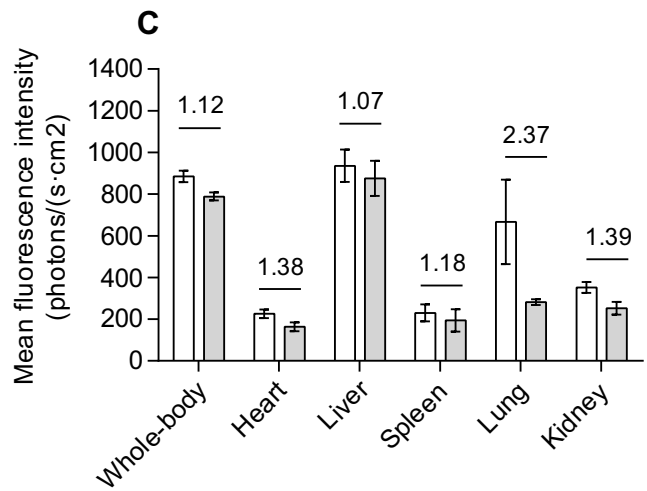

Figure S4. In vivo tracking of 9D11 and 9D11-Tat antibody distributions with near-infrared fluorescent dyes in HBV-Tg mice

Supplementary Table S1. Amino acid sequence of 9D11 antibody variants.

|                                                                           | amino acid sequence                                                                                                                                                                                                                                                                                                                                                                                                                                                                                                  |
|---------------------------------------------------------------------------|----------------------------------------------------------------------------------------------------------------------------------------------------------------------------------------------------------------------------------------------------------------------------------------------------------------------------------------------------------------------------------------------------------------------------------------------------------------------------------------------------------------------|
| 9D11 antibody H Chain V                                                   | QVQLQQPGAELVRPGASVKLSCKASGYSFTSFWISWVKQ                                                                                                                                                                                                                                                                                                                                                                                                                                                                              |
| region                                                                    | RPGQGLEWIAMIHPSDNGIRFNQKFKDKATLTVDKSSSTA<br>YMQLNSTSEDSAVYFCARAGTATFTYWGQGTLTVSA                                                                                                                                                                                                                                                                                                                                                                                                                                     |
| 9D11 antibody L Chain V                                                   | DIQMTQTTSSLSVSLGDRVTISCRASQDISNYLNWYQQKP                                                                                                                                                                                                                                                                                                                                                                                                                                                                             |
| region                                                                    | DGIVKLLIYYTSRLHSGVPSRFSGSGSGTDYSLTISNLEQE<br>DLATYFCQQGNALPWTFGGGTKLEIKRA                                                                                                                                                                                                                                                                                                                                                                                                                                            |
| H chain sequence of<br>9D11-Tat<br>(Tat sequence was<br>underline is Tat) | QVQLQQPGAELVRPGASVKLSCKASGYSFTSFWISWVKQ<br>RPGQGLEWIAMIHPSDNGIRFNQKFKDKATLTVDKSSSTA<br>YMQLNSTSEDSAVYFCARAGTATFTYWGQGTLTVSAA<br>RPTPPSVYPLAPGSAAQTNSMVTLGCLVKGYFPEPVTVT<br>WNSGSLSSGVHTFPAVLQSDLYTLSSSVTVPSSTWPSET<br>VTCNVAHPASSTKVDKKIVPRDCGCKPCICTVPEVSSVFIF<br>PPKPKDVLITLTPKVTCVVVDISKDDPEVQFSWFVDDVEV<br>HTAQTQPREEQFNSTFRSVSELPIMHQDWLNGKEFKCRV<br>NSAAFPAPIEKTISKTKGRPKAPQVYTIPPPKEQMAKDKVS<br>LTCMITDFFPEDITVEWQWNGQPAENYKNTQPIMDTDGS<br>YFVYSKLVNQQSNWEAGNTFTCSVLHEGLHNHHTKSL<br><u>HSPGKGRKKRRQRRRPPQ</u> |
| H chain sequence of<br>9D11-Tat-CH3 <sup>-/-</sup>                        | QVQLQQPGAELVRPGASVKLSCKASGYSFTSFWISWVKQ<br>RPGQGLEWIAMIHPSDNGIRFNQKFKDKATLTVDKSSSTA                                                                                                                                                                                                                                                                                                                                                                                                                                  |

---

|                   |                                                     |
|-------------------|-----------------------------------------------------|
| (Tat sequence was | YMQ <del>LN</del> SPTSEDSAVYFCARAGTATFTYWGQGLTVTSAA |
| underline is Tat) | RPTPPSVYPLAPGSAAQTNSMVTLGCLVKGYFPEPVTVT             |
|                   | WNSGSLSSGVHTFPAVLQSDLYTLSSSVTVPSSTWPSET             |
|                   | VTCNVAHPASSTKVDKKIVPRDCGCKPCICTVPEVSSVFIF           |
|                   | PPKPKDVLITLTPKVTCVVVDISKDDPEVQFSWFVDDVEV            |
|                   | HTAQTQPREEQFNSTFRSVSELPIMHQDWLNGKEFKCRV             |
|                   | NSAAFPAPIEKTISKTK <u>GRKKRRRPPQ</u>                 |

---

|                          |                                                     |
|--------------------------|-----------------------------------------------------|
| H chain sequence of      | QVQLQQPGAELVRPGASVKLSCKASGYSFTSFWISWVKQ             |
| 9D11-Tat-Mut             | RPGQGLEWIAMIHPSDNGIRFNQKFKDKATLTVDKSSSTA            |
| (Tat sequence was        | YMQ <del>LN</del> SPTSEDSAVYFCARAGTATFTYWGQGLTVTSAA |
| underline is Tat, H433A, | RPTPPSVYPLAPGSAAQTNSMVTLGCLVKGYFPEPVTVT             |
| N434A and H435A          | WNSGSLSSGVHTFPAVLQSDLYTLSSSVTVPSSTWPSET             |
| mutations were indicated | VTCNVAHPASSTKVDKKIVPRDCGCKPCICTVPEVSSVFIF           |
| at red)                  | PPKPKDVLITLTPKVTCVVVDISKDDPEVQFSWFVDDVEV            |
|                          | HTAQTQPREEQFNSTFRSVSELPIMHQDWLNGKEFKCRV             |
|                          | NSAAFPAPIEKTISKTKGRPKAPQVYTIPPPKEQMAKDKVS           |
|                          | LTCMITDFFPEDITVEWQWNGQPAENYKNTQPIMDTDGS             |
|                          | YFVYSKLVQKSNWEAGNTFTCSVLHEGLAAAHTEKSL               |
|                          | HSPGK <u>GRKKRRRPPQ</u>                             |

---

Supplementary Table S2. Sequence of siRNA

| ID            | Sequence of siRNA        |
|---------------|--------------------------|
| TRIM21-1      | UGGCAUGGAGGCACCUGAAGGUGG |
| TRIM21-2      | UCAUUGUCAAGCGUGCUGC      |
| Control siRNA | UUCUCCGAACGUGUCACGUTT    |

**Supplemental Figure 1.** Evaluations of dose-dependent anti-HBV effect (A) and potential cytotoxicity (B) of 9D11-Tat. The HBV48-WT-transfected Huh7 cells were treated with a series of two-fold dilutions of 9D11-Tat, Ctr-Ab-Tat, and 9D11. Two days after treatments, the extracellular HBsAg levels were measured and were expressed as the mean  $\pm$  SD. For evaluation of potential cytotoxicity, Huh7 cells that treated with different mAbs at a concentration of 400  $\mu$ g/mL. Two days after treatments, the culture medium was collected for CCK assays. The data represent mean  $\pm$  SD from three independent experiments.

**Supplemental Figure 2.** Influence of 9D11-Tat on the promoter activities of NF- $\kappa$ B (A), AP1 (B) and IFN- $\beta$  (C). Huh7 cells that transfected with HBV48-WT and luciferase reporter vectors of NF- $\kappa$ B, AP1 or IFN- $\beta$  were treated with 9D11-Tat, Ctr Ab-Tat and 9D11 mAbs, respectively. Two days after treatments the cells were collected for intracellular luciferase measurements. The data represent mean  $\pm$  SD from three independent experiments.

**Supplemental Figure 3.** Anti-IFN- $\beta$  neutralizing antibody could partially reverse 9D11-Tat-mediated HBV suppression. Dose-dependent (0.0625  $\mu$ g/mL to 1.0  $\mu$ g/mL) blocking effects of anti-IFN- $\beta$  neutralizing antibody to 9D11-Tat mediated inhibitions on HBsAg (A), HBeAg (B), and HBcAg (C). The data represent mean  $\pm$  SD from three independent tests for each concentration.

**Supplemental Figure 4.** In vivo tracking of 9D11 and 9D11-Tat antibody



distributions with near-infrared fluorescent dyes in HBV-Tg mice. Dylight680 labeled 9D11-Tat and 9D11 (5 mg/kg) were injected into HBV-Tg mice. (A) Fluorescence images of whole animals and isolated tissues harvested at 24 h after mAb infusions. Semi-quantitative analyses of (A) using the software package included with the *in vivo* imaging system on total (B) and mean (C) fluorescence intensity. The average fold-change number between 9D11-Tat and 9D11 group is indicated on the bar.
